# Supplementary material for: A single power stroke by ATP binding drives substrate translocation in a heterodimeric ABC transporter
Source: eLife journal article supplement (doi:10.7554/elife.55943), 2020-04-21
Supplement: supp [file elife-55943-supp-v1.zip]

Archive with 12 entries (12 files):
- elife_poa_e55943_Figure_1_source_data_1.docx
- elife_poa_e55943_Figure_4_source_data_1.docx
- elife_poa_e55943_Figure_4_figure_supplement_1.png
- elife_poa_e55943_Figure_3_source_data_1.docx
- elife_poa_e55943_Figure_1_figure_supplement_1.png
- elife_poa_e55943_Figure_2_source_data_1.docx
- elife_poa_e55943_Transparent_Reporting_File.pdf
- elife_poa_e55943_Figure_5_figure_supplement_1.png
- elife_poa_e55943_Figure_5_source_data_1.docx
- elife_poa_e55943_Figure_1_figure_supplement_2.png
- elife_poa_e55943_Figure_3_figure_supplement_1.png
- elife_poa_e55943_Figure_2_figure_supplement_1.png
