# Supplementary figures and images for: A single power stroke by ATP binding drives substrate translocation in a heterodimeric ABC transporter
Source: eLife journal article supplement (doi:10.7554/elife.55943), 2020-04-21

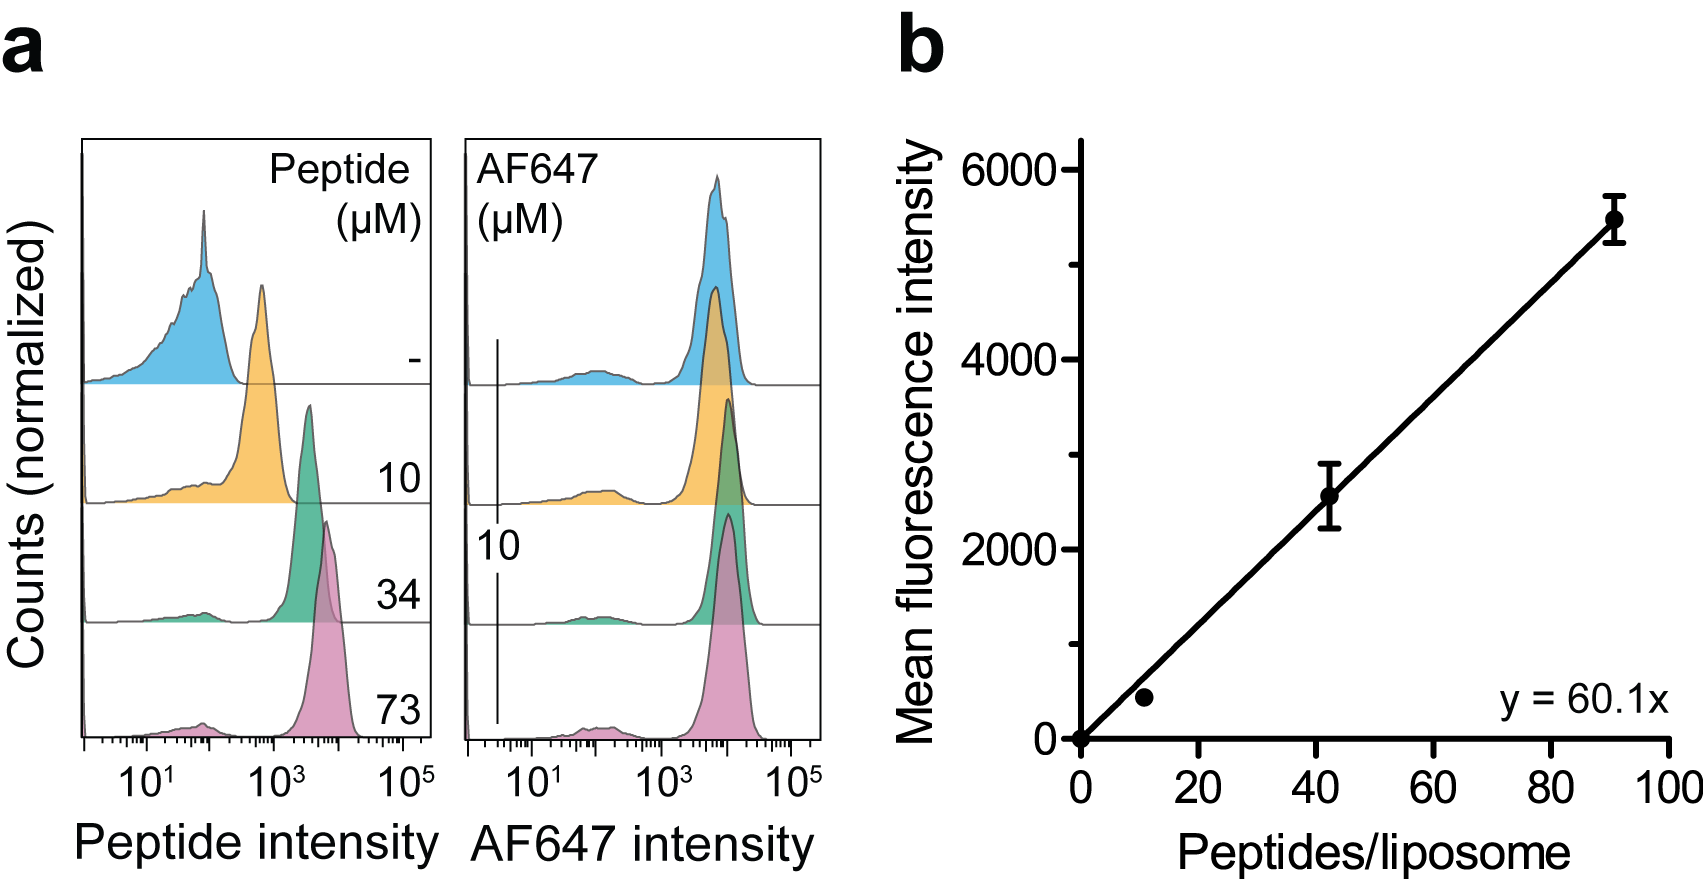

Supplement: supp [file elife-55943-supp-v1.zip › elife_poa_e55943_Figure_4_figure_supplement_1.png]

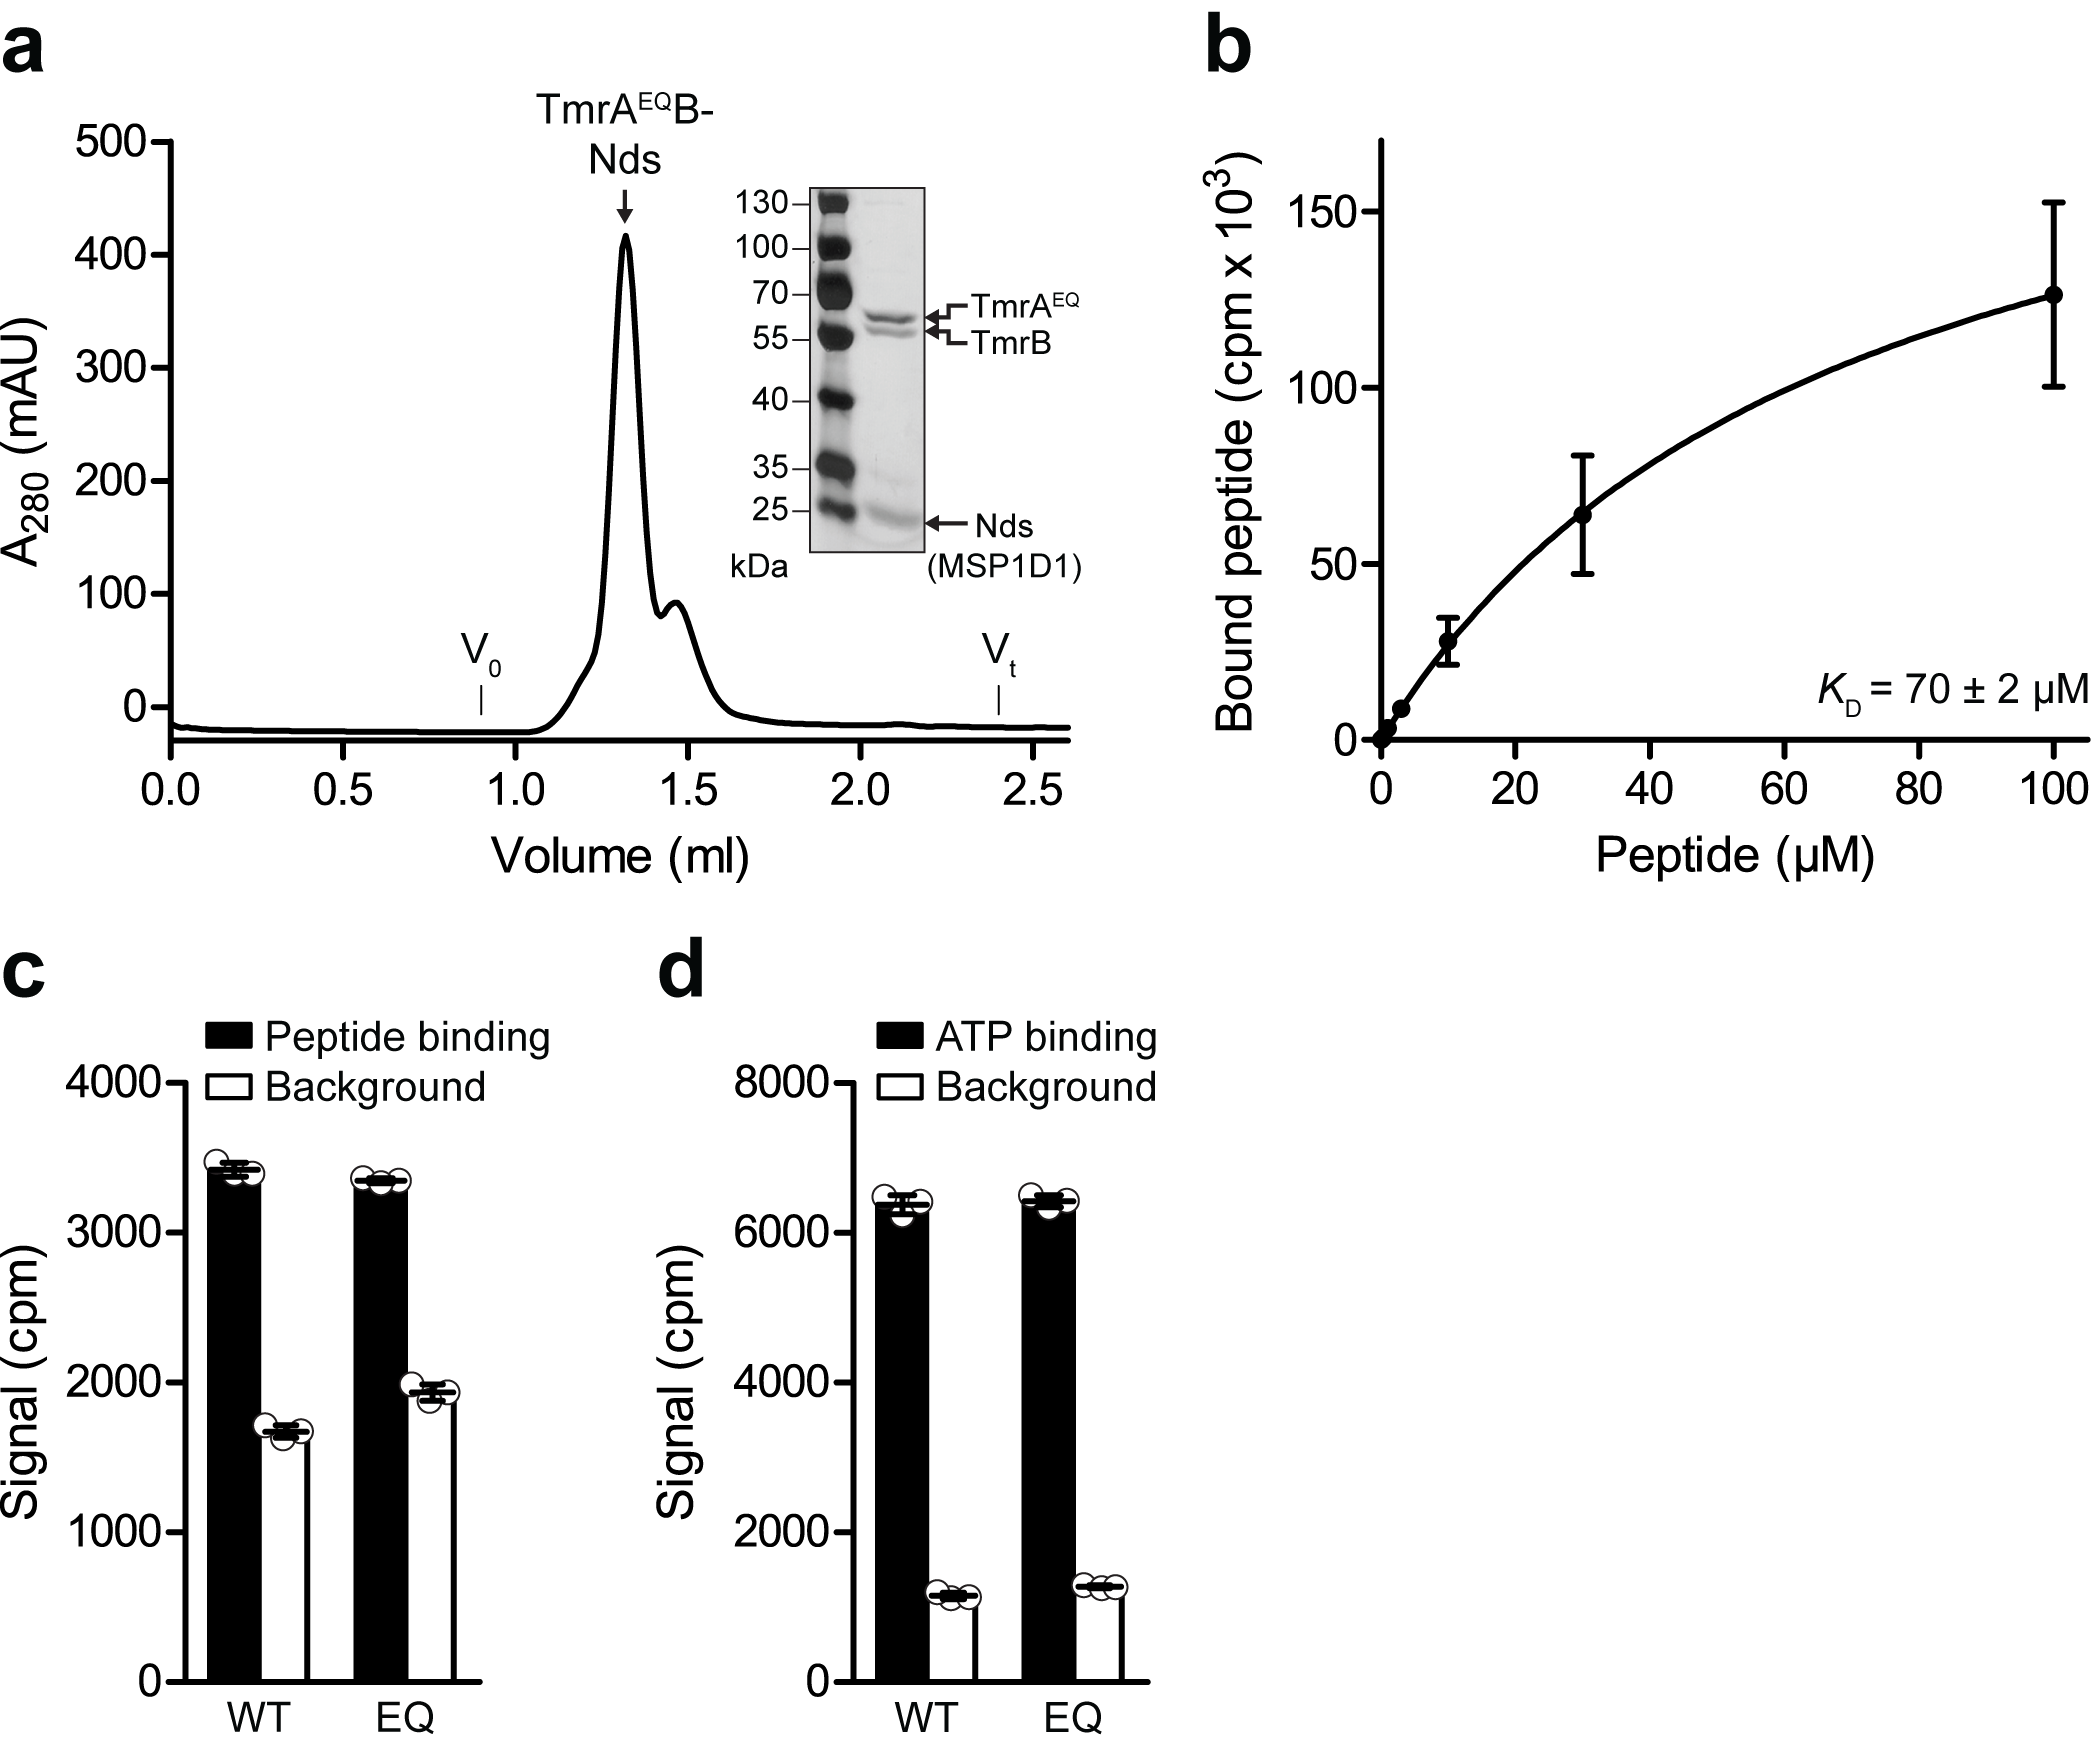

Supplement: supp [file elife-55943-supp-v1.zip › elife_poa_e55943_Figure_1_figure_supplement_1.png]

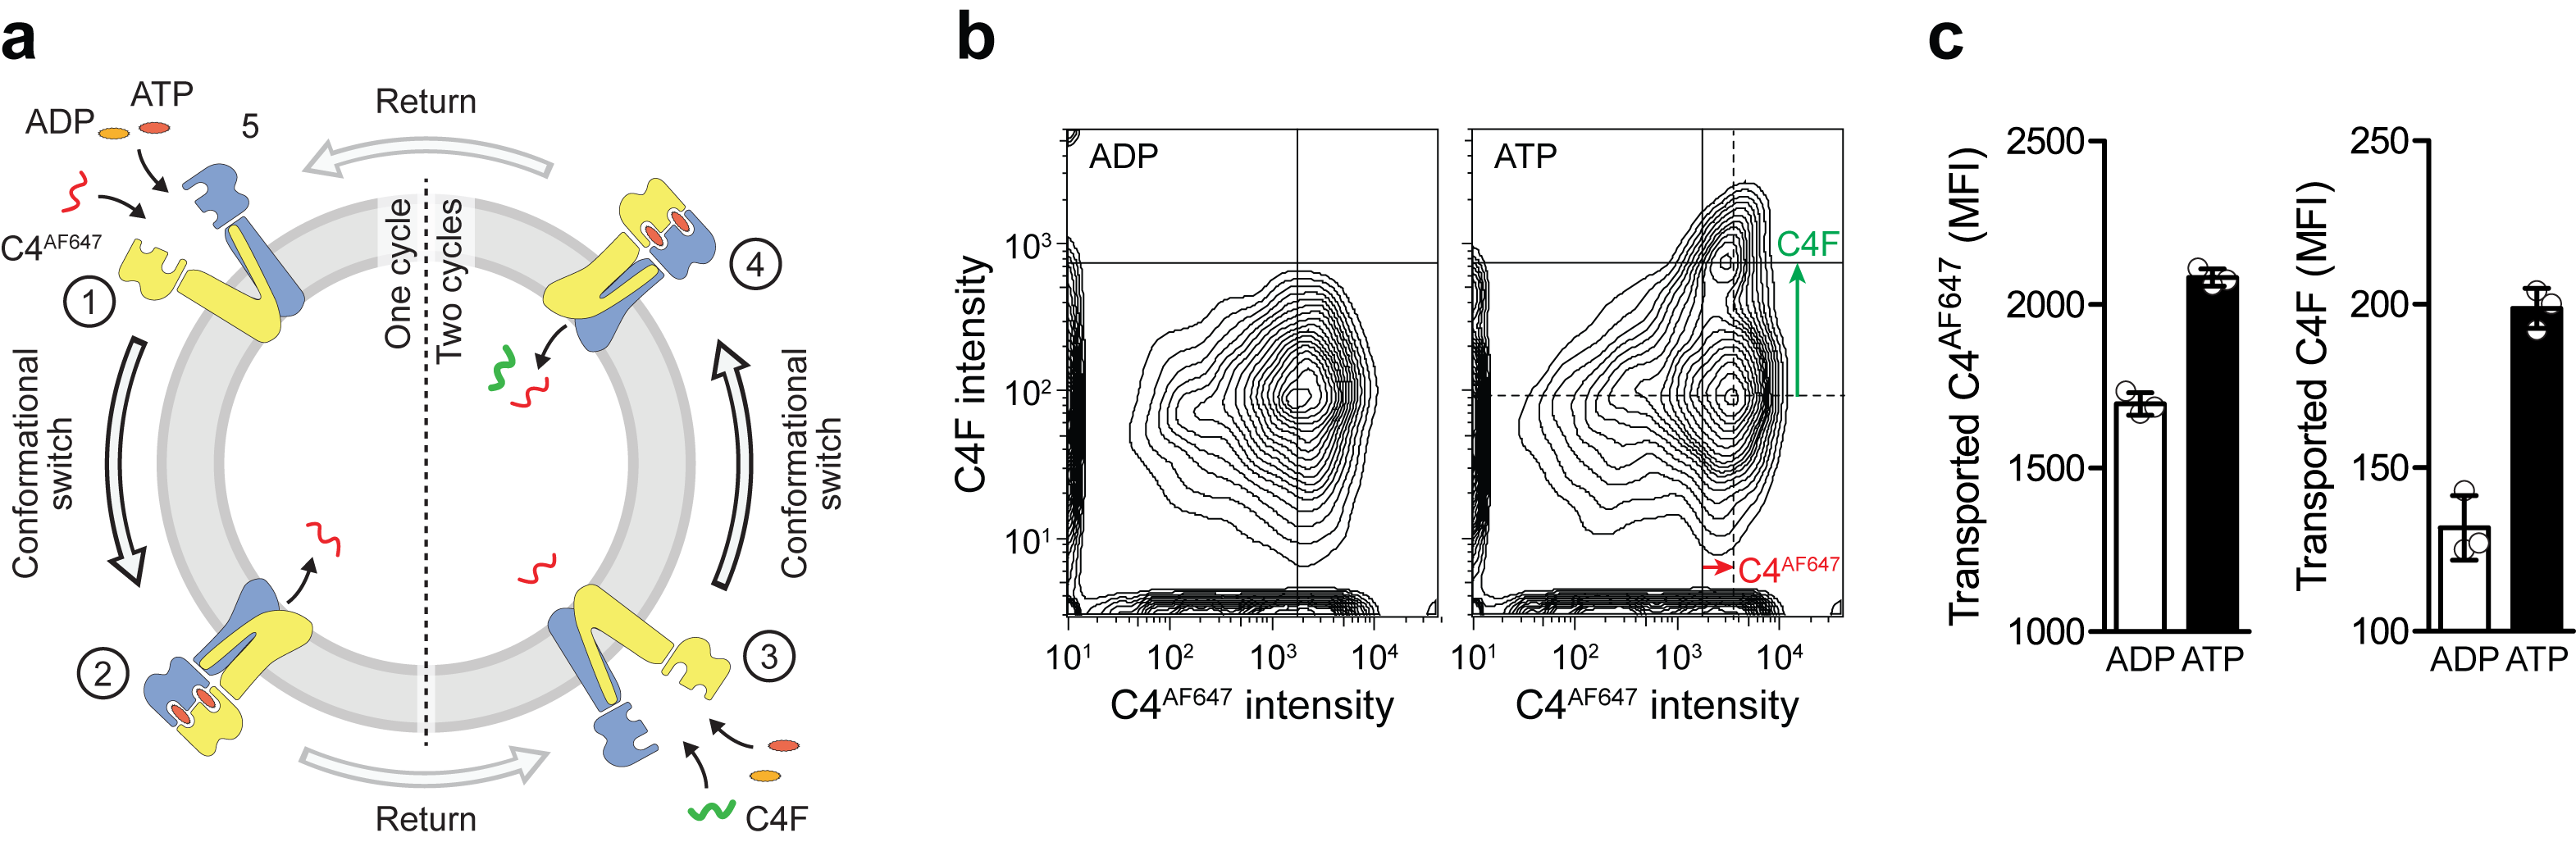

Supplement: supp [file elife-55943-supp-v1.zip › elife_poa_e55943_Figure_5_figure_supplement_1.png]

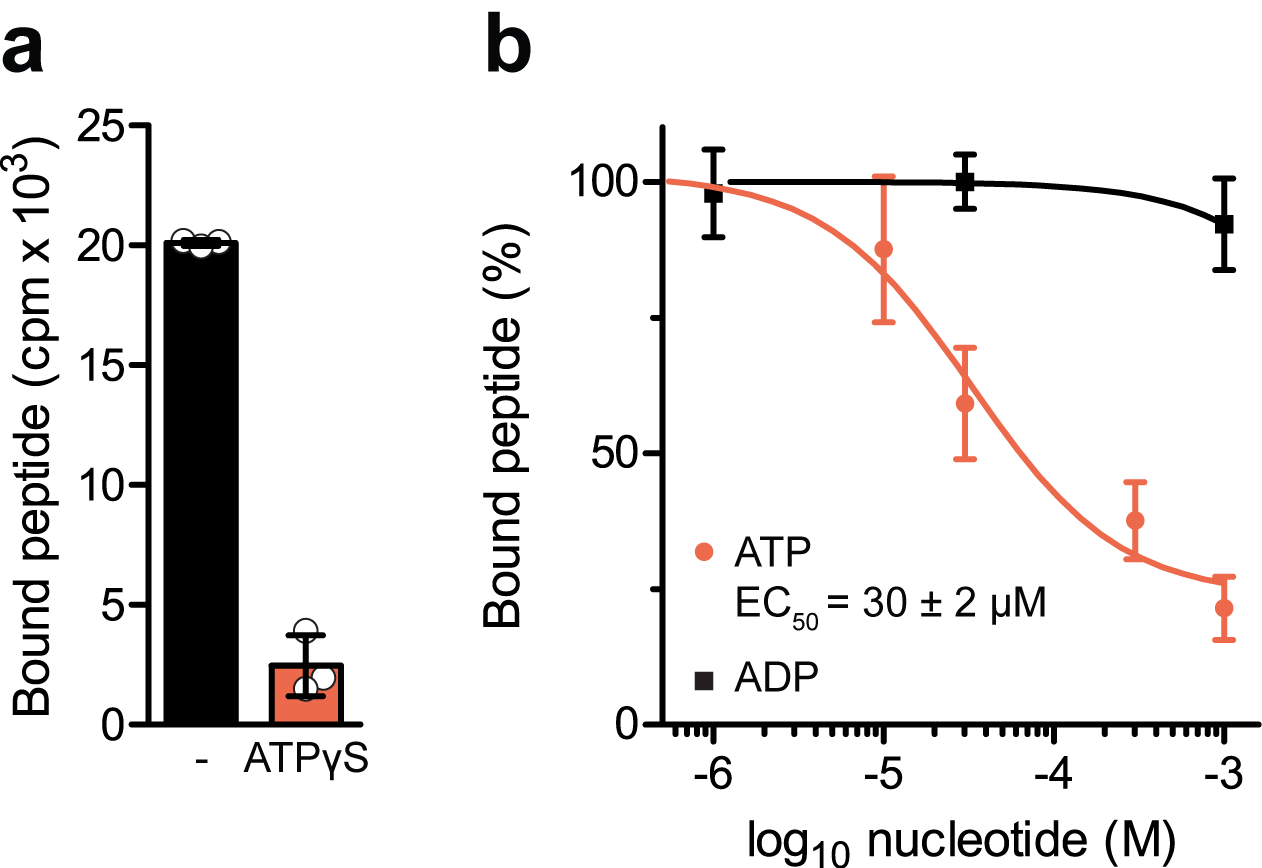

Supplement: supp [file elife-55943-supp-v1.zip › elife_poa_e55943_Figure_1_figure_supplement_2.png]

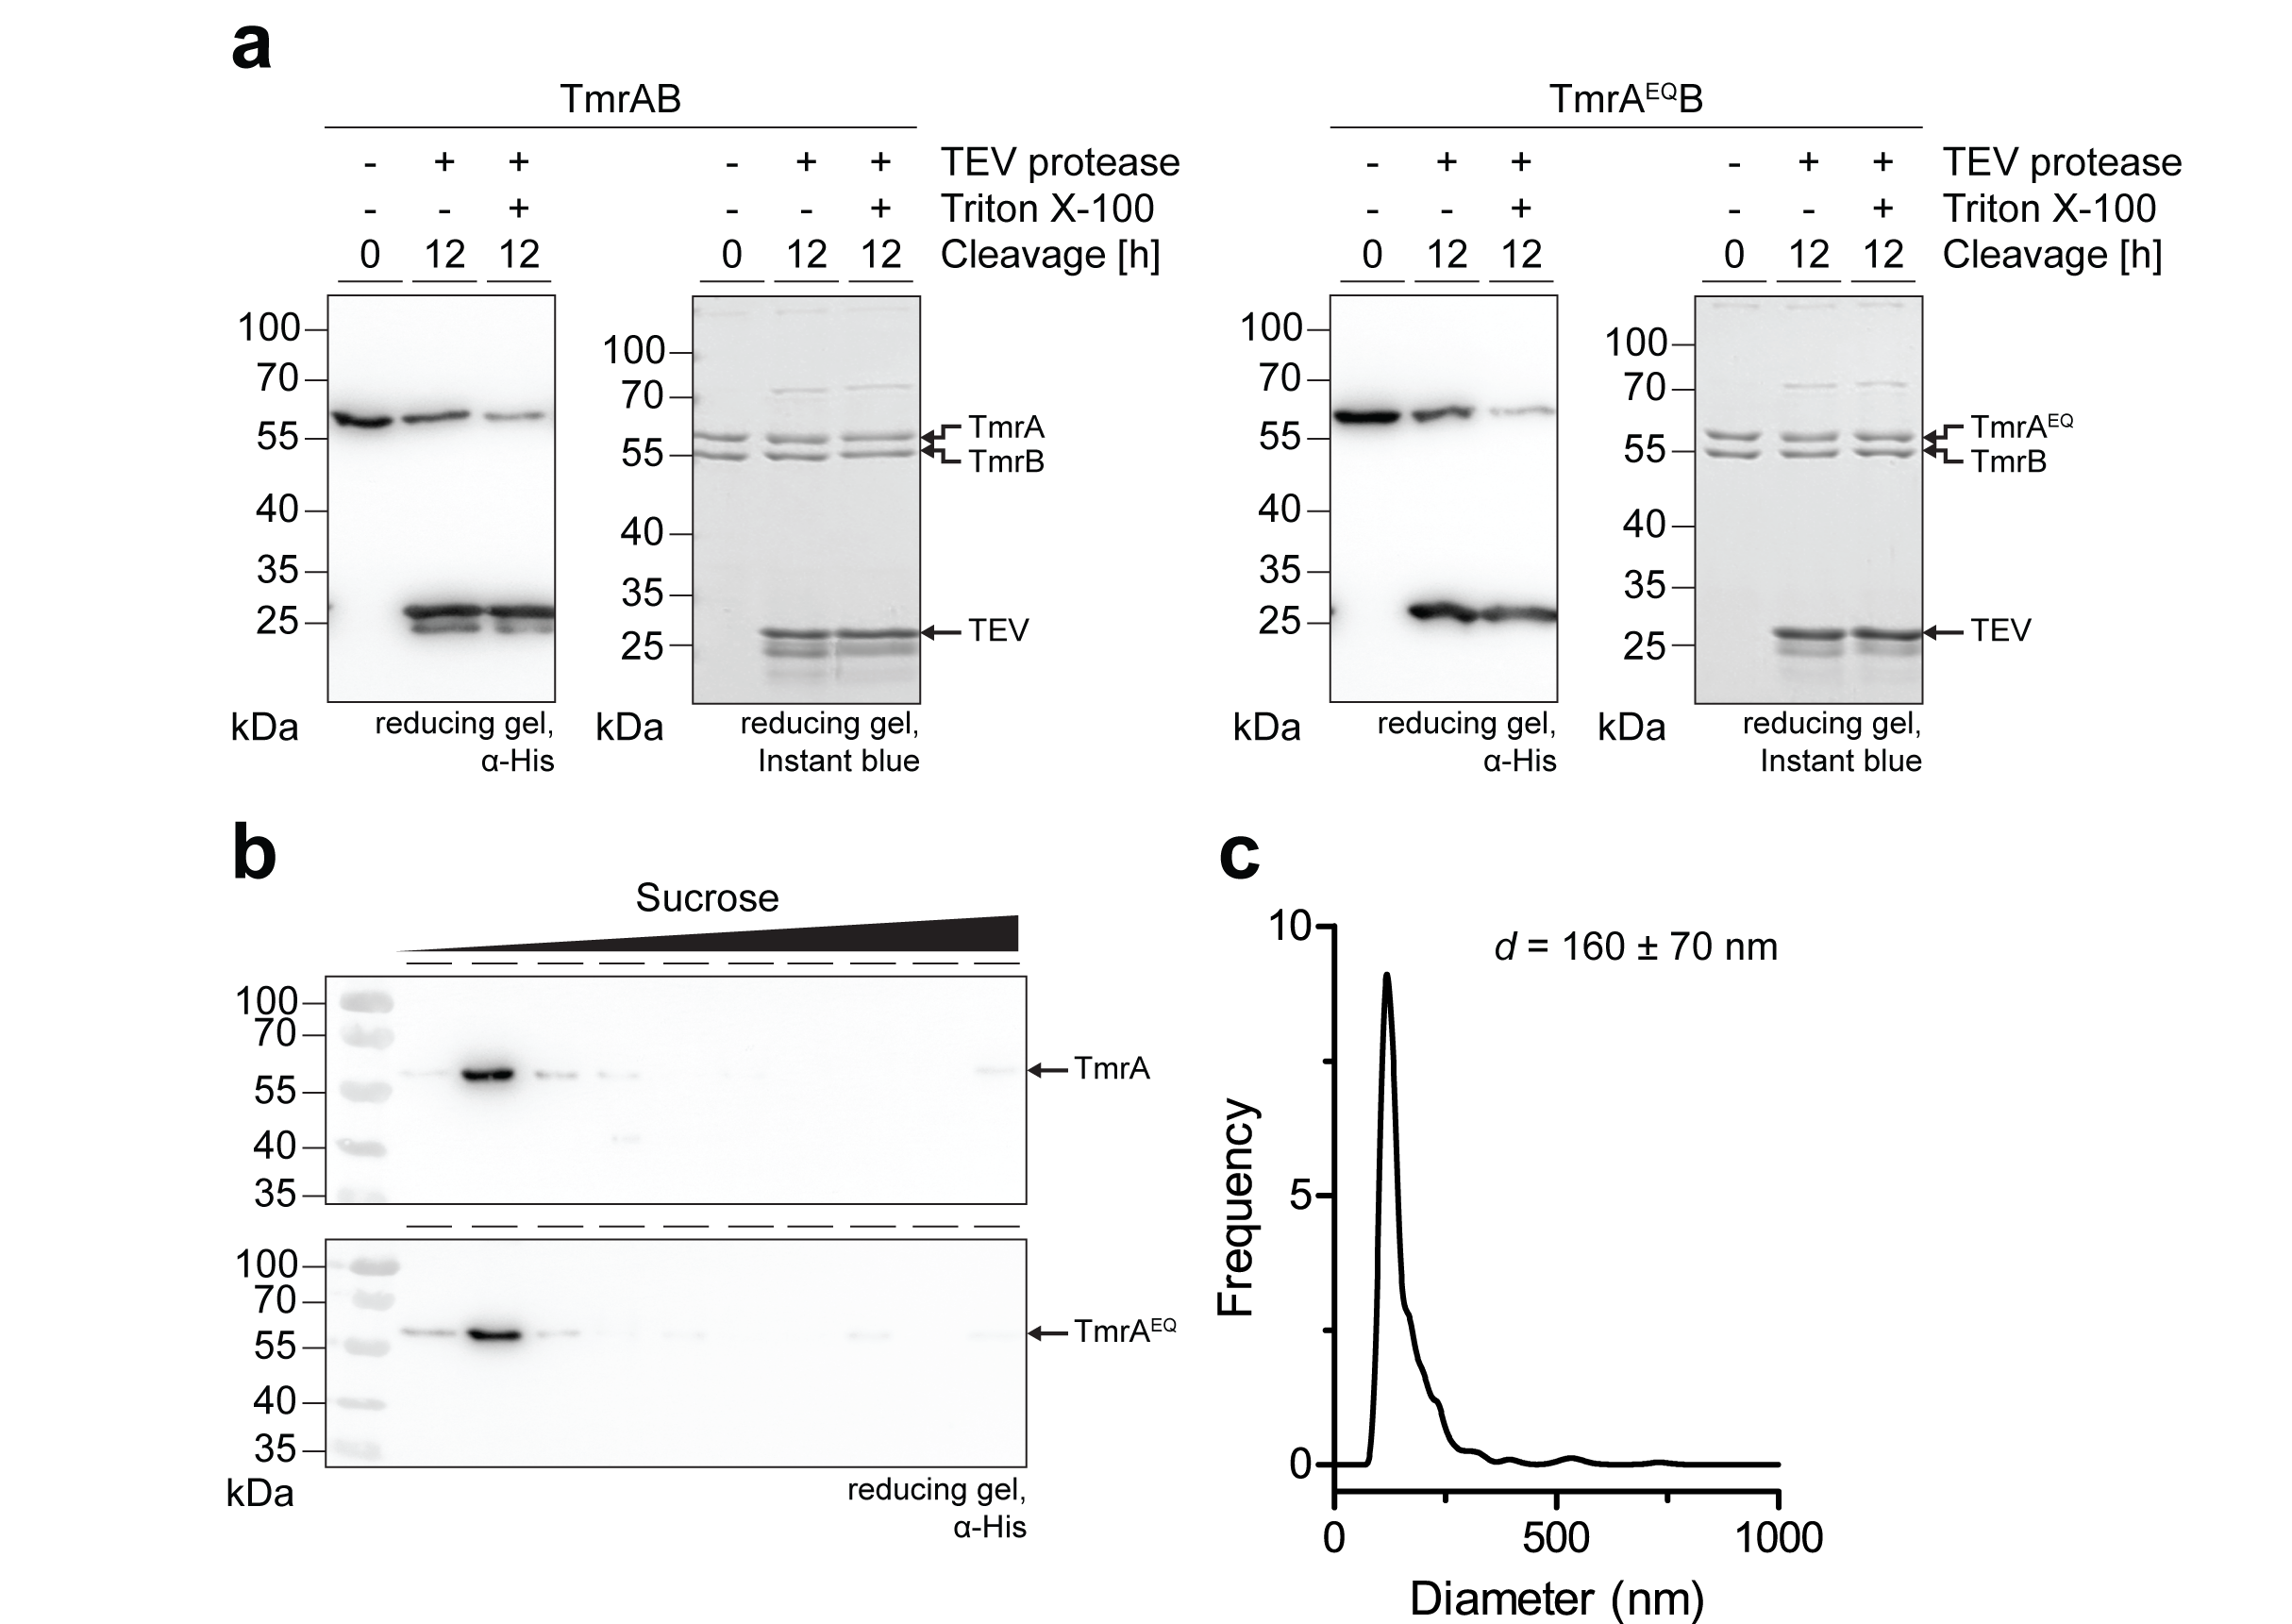

Supplement: supp [file elife-55943-supp-v1.zip › elife_poa_e55943_Figure_3_figure_supplement_1.png]

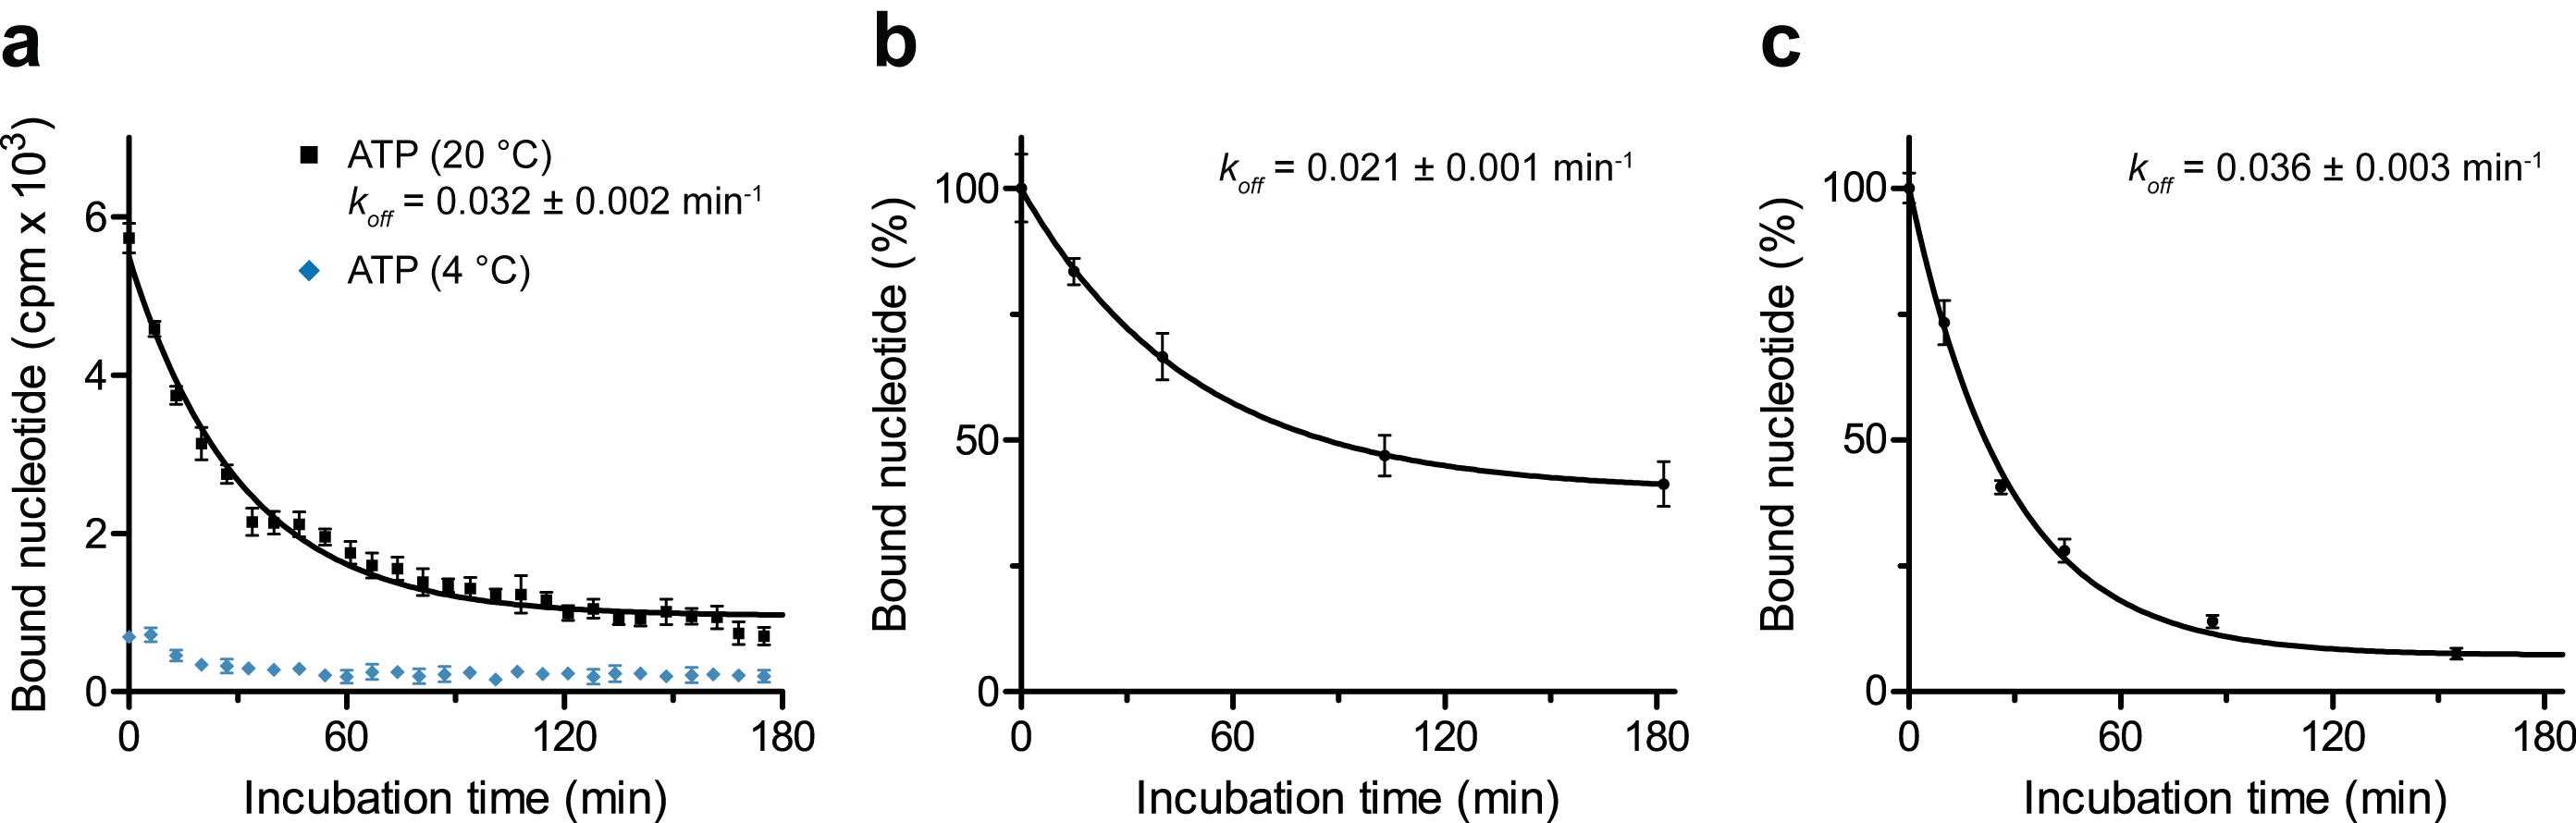

Supplement: supp [file elife-55943-supp-v1.zip › elife_poa_e55943_Figure_2_figure_supplement_1.png]
